# Supplementary material for: Call to action: overcoming enrollment disparities in cancer clinical trials with modernized eligibility criteria
Source: PubMed Central journal article supplement (PMC9978314; doi:10.1093/jncics/pkad009), 2023-02-21
Supplement: pkad009_supplementary_data.pdf [file pkad009_supplementary_data.pdf]

**Supplementary Table 1. Compliance with modernized eligibility criteria by disease stage (unresectable, resectable, both), study phase, and study sponsor.** Denominators vary based on availability of data; missing or unknown values were not included in determining the proportion of trials that were compliant. Allowance of brain metastases, if stable for > 4 weeks, was assessed only for trials that included patients with metastatic disease.

| Eligibility Criteria                                  | Disease Stage   |                   |                 |                 | Study Phase    |                 |                 |                 |               |              |                 |                 |
|-------------------------------------------------------|-----------------|-------------------|-----------------|-----------------|----------------|-----------------|-----------------|-----------------|---------------|--------------|-----------------|-----------------|
|                                                       | Resectable      | Unresectable      | Both            | p-value         | Early 1        | 1               | 1 2             | 2               | 3             | 4            | N/A             | p-value         |
| N (%)                                                 | 62<br>(31.3)    | 115<br>(58.1)     | 21<br>(10.6)    | -- <sup>a</sup> | 12<br>(6.1)    | 42<br>(21.2)    | 31<br>(15.7)    | 86<br>(43.4)    | 6<br>(3.0)    | 1<br>(0.5)   | 20<br>(10.1)    | -- <sup>a</sup> |
| Performance Status 2 Allowed                          | 16/54<br>(29.6) | 39/108<br>(36.1)  | 10/17<br>(58.8) | 0.099           | 7/11<br>(63.6) | 12/38<br>(31.6) | 11/29<br>(37.9) | 24/81<br>(29.6) | 1/6<br>(16.7) | 0/1<br>(0.0) | 10/13<br>(76.9) | 0.099           |
| HIV+ Allowed                                          | 17/47<br>(36.2) | 28/106<br>(26.4)  | 9/17<br>(52.9)  | 0.071           | 3/10<br>(30.0) | 13/39<br>(33.3) | 8/30<br>(26.7)  | 23/73<br>(31.5) | 2/6<br>(33.3) | 0/1<br>(0.0) | 5/11<br>(45.5)  | 0.706           |
| Renal Function Compliant (Use of CrCl only)           | 4/39<br>(10.3)  | 8/82<br>(9.8)     | 1/14<br>(7.1)   | 1.000           | 1/9<br>(11.1)  | 5/33<br>(15.2)  | 1/21<br>(4.8)   | 4/56<br>(7.1)   | 1/5<br>(20.0) | 0/1<br>(0.0) | 1/10<br>(10.0)  | 1.000           |
| Reference Ranges for Labs                             | 37/39<br>(94.9) | 79/80<br>(98.8)   | 13/15<br>(86.7) | 0.037           | 10/10<br>(100) | 32/34<br>(94.1) | 22/22<br>(100)  | 52/54<br>(96.3) | 5/5<br>(100)  | 1/1<br>(100) | 7/8<br>(87.5)   | 0.037           |
| Classification System for Heart Failure               | 12/32<br>(37.5) | 44/68<br>(64.7)   | 5/10<br>(50)    | 0.034           | 5/8<br>(62.5)  | 13/24<br>(54.2) | 11/20<br>(55.0) | 28/50<br>(56.0) | 2/2<br>(100)  | 1/1<br>(100) | 1/5<br>(20.0)   | 0.034           |
| Cardiac Abnormalities Specified                       | 33/62<br>(53.2) | 81/115<br>(70.4)  | 12/21<br>(57.1) | 0.059           | 9/12<br>(75)   | 26/42<br>(61.9) | 24/31<br>(77.4) | 57/86<br>(66.3) | 3/6<br>(50)   | 1/1<br>(100) | 6/20<br>(30.0)  | 0.059           |
| QTc Compliant                                         | 53/56<br>(94.6) | 104/108<br>(96.3) | 19/19<br>(100)  | 0.730           | 11/11<br>(100) | 39/39<br>(100)  | 30/30<br>(100)  | 74/81<br>(91.4) | 6/6<br>(100)  | 1/1<br>(100) | 15/15<br>(100)  | 0.730           |
| Prior Malignancy >24 Months Ago Allowed               | 35/62<br>(56.5) | 78/115<br>(67.8)  | 17/21<br>(81.0) | 0.095           | 8/12<br>(66.7) | 27/42<br>(64.3) | 18/31<br>(58.1) | 55/86<br>(64.0) | 6/6<br>(100)  | 1/1<br>(100) | 15/20<br>(75.0) | 0.095           |
| Concurrent Malignancy Allowed if Stable/Off Treatment | 7/37<br>(18.9)  | 13/71<br>(18.3)   | 4/13<br>(30.8)  | 0.565           | 1/7<br>(14.3)  | 7/24<br>(29.2)  | 5/22<br>(22.7)  | 10/59<br>(16.9) | 0/2<br>(0.0)  | 0/1<br>(0.0) | 1/6<br>(16.7)   | 0.565           |
| Prior Therapy Allowed & Exclusions Specified          | 22/23<br>(95.7) | 95/97<br>(97.9)   | 10/11<br>(90.9) | 0.276           | 6/6<br>(100)   | 34/36<br>(94.4) | 24/25<br>(96.0) | 52/52<br>(100)  | ¾<br>(75.0)   | 0/0<br>(0.0) | 8/8<br>(100)    | 0.276           |
| Time-Based Washout Period Used                        | 10/22<br>(45.5) | 60/99<br>(60.6)   | 4/11<br>(36.4)  | 0.158           | 4/6<br>(66.7)  | 17/36<br>(47.2) | 20/26<br>(76.9) | 27/52<br>(51.9) | ¾<br>(75.0)   | 0/0<br>(0.0) | 3/8<br>(37.5)   | 0.158           |
| Recovery from Prior Adverse Events                    | 3/22<br>(13.6)  | 47/99<br>(47.5)   | 4/11<br>(36.4)  | 0.011           | 1/6<br>(16.7)  | 8/36<br>(22.2)  | 13/26<br>(50)   | 28/52<br>(53.8) | ¾<br>(75.0)   | 0/0<br>(0.0) | 1/7<br>(12.5)   | 0.011           |
| Brain Metastases Allowed if Stable >4 weeks           | 0/0<br>(0)      | 46/77<br>(59.7)   | 0/1<br>(0)      | 0.410           | ½<br>(50.0)    | 11/18<br>(61.1) | 13/21<br>(61.9) | 19/32<br>(59.4) | 2/3<br>(66.7) | 0/0<br>(0.0) | 0/2<br>(0.0)    | 0.410           |

<sup>a</sup>Not applicable

**Supplementary Table 1 (continued). Compliance with modernized eligibility criteria by disease stage (unresectable, resectable, both), study phase, and study sponsor.** Denominators vary based on availability of data; missing or unknown values were not included in determining the proportion of trials that were compliant. Allowance of brain metastases, if stable for > 4 weeks, was assessed only for trials that included patients with metastatic disease.

| Eligibility Criteria                                  | Study Sponsor   |                |                  |               |                 |                        |                 | p-value         |
|-------------------------------------------------------|-----------------|----------------|------------------|---------------|-----------------|------------------------|-----------------|-----------------|
|                                                       | Industry        | Industry + NIH | Industry + Other | NIH           | NIH + Other     | Industry + NIH + Other | Other           |                 |
| N (%)                                                 | 21<br>(10.6)    | 1<br>(0.5)     | 52<br>(26.3)     | 7<br>(3.5)    | 30<br>(15.2)    | 6<br>(3.0)             | 81<br>(40.9)    | -- <sup>a</sup> |
| Performance Status 2 Allowed                          | 6/20<br>(30.0)  | 0/0<br>(0.0)   | 17/50<br>(34.0)  | 3/7<br>(42.9) | 9/28<br>(32.1)  | 1/6<br>(16.7)          | 29/68<br>(42.6) | 0.743           |
| HIV+ Allowed                                          | 3/18<br>(16.7)  | 1/1<br>(100)   | 11/49<br>(22.4)  | 4/6<br>(66.7) | 9/26<br>(34.6)  | 2/6<br>(33.3)          | 24/64<br>(37.5) | 0.091           |
| Renal Function Compliant (Use of CrCl only)           | 4/15<br>(26.7)  | 0/0<br>(0.0)   | 1/31<br>(3.2)    | 1/7<br>(14.3) | 2/25<br>(8.0)   | 0/5<br>(0.0)           | 5/52<br>(9.6)   | 0.217           |
| Reference Ranges for Labs                             | 15/15<br>(100)  | 0/0<br>(0.0)   | 31/31<br>(100)   | 7/7<br>(100)  | 24/27<br>(88.9) | 5/5<br>(100)           | 47/49<br>(95.9) | 0.390           |
| Classification System for Heart Failure               | 8/12<br>(66.7)  | 1/1<br>(100)   | 15/31<br>(48.4)  | 4/5<br>(80)   | 14/23<br>(60.9) | 1/2<br>(50)            | 18/36<br>(50.0) | 0.730           |
| Cardiac Abnormalities Specified                       | 14/21<br>(66.7) | 1/1<br>(100)   | 32/52<br>(61.5)  | 6/7<br>(85.7) | 24/30<br>(80.0) | 2/6<br>(33.3)          | 47/81<br>(58.0) | 0.152           |
| QTc Compliant                                         | 16/18<br>(88.9) | 1/1<br>(100)   | 45/47<br>(95.7)  | 6/7<br>(3.5)  | 27/28<br>(96.4) | 6/6<br>(100)           | 75/76<br>(98.7) | 0.181           |
| Prior Malignancy >24 Months Ago Allowed               | 11/21<br>(52.4) | 1/1<br>(100)   | 33/52<br>(63.5)  | 4/7<br>(57.1) | 22/30<br>(73.3) | 4/6<br>(66.7)          | 55/81<br>(67.9) | 0.759           |
| Concurrent Malignancy Allowed if Stable/Off Treatment | 1/12<br>(8.3)   | 0/1<br>(0.0)   | 11/39<br>(28.2)  | 1/5<br>(20)   | 3/19<br>(15.8)  | 2/6<br>(33.3)          | 6/39<br>(15.4)  | 0.610           |
| Prior Therapy Allowed & Exclusions Specified          | 16/17<br>(94.1) | 0/0<br>(0.0)   | 42/42<br>(100)   | 6/7<br>(85.7) | 22/23<br>(95.7) | 5/5<br>(100)           | 36/37<br>(97.3) | 0.196           |
| Time-Based Washout Period Used                        | 10/18<br>(55.6) | 0/0<br>(0.0)   | 27/43<br>(62.8)  | 6/7<br>(85.7) | 12/23<br>(52.2) | 3/5<br>(60.0)          | 16/36<br>(44.4) | 0.375           |
| Recovery from Prior Adverse Events                    | 11/18<br>(61.1) | 0/0<br>(0.0)   | 16/43<br>(37.2)  | 5/7<br>(71.4) | 12/23<br>(52.2) | 1/5<br>(20.0)          | 9/36<br>(25.0)  | 0.034           |
| Brain Metastases Allowed if Stable >4 weeks           | 8/15<br>(53.3)  | 0/0<br>(0.0)   | 18/28<br>(64.3)  | 3/4<br>(75.0) | 8/11<br>(72.7)  | 0/1<br>(0.0)           | 9/19<br>(47.4)  | 0.552           |

<sup>a</sup>Not applicable
